# Supplementary material
Source: Elsevier journal article supplement (https://www.sciencedirect.com/science/article/pii/S0004370201001515)
Supplement: 1-s2.0-S0004370201001515-main.pdf [file 1-s2.0-S0004370201001515-main.pdf]

# Local search characteristics of incomplete SAT procedures<sup>☆</sup>

Dale Schuurmans\*, Finnegan Southey

*Department of Computer Science, University of Waterloo, Waterloo, ON N2L 3G1, Canada*

Received 19 January 2001

---

## Abstract

Effective local search methods for finding satisfying assignments of CNF formulae exhibit several systematic characteristics in their search. We identify a series of measurable characteristics of local search behavior that are predictive of problem solving efficiency. These measures are shown to be useful for diagnosing inefficiencies in given search procedures, tuning parameters, and predicting the value of innovations to existing strategies. We then introduce a new local search method, SDF (“smoothed descent and flood”), that builds upon the intuitions gained by our study. SDF works by greedily descending in an informative objective (that considers how strongly clauses are satisfied, in addition to counting the number of unsatisfied clauses) and, once trapped in a local minima, “floods” this minima by re-weighting unsatisfied clauses to create a new descent direction. The resulting procedure exhibits superior local search characteristics under our measures. We show that this method can compete with the state of the art techniques, and significantly reduces the number of search steps relative to many recent methods. © 2001 Elsevier Science B.V. All rights reserved.

*Keywords:* Local search; Satisfiability; Constraint satisfaction; Experimental analysis

---

## 1. Introduction

Since the introduction of GSAT [24] there has been considerable research on local search methods for finding satisfying assignments for CNF formulae. These methods are surprisingly effective: they can often find satisfying assignments for large CNF formulae that are beyond the capability of current systematic search methods [24].<sup>1</sup> Of course,

---

<sup>☆</sup> This is an extended version of a prize-winning paper presented at AAAI 2000, Austin, Texas, USA.

\* Corresponding author.

*E-mail addresses:* dale@cs.uwaterloo.ca (D. Schuurmans), fdjsouth@cs.uwaterloo.ca (F. Southey).

<sup>1</sup> However, see [2,14] for competitive systematic search results.

local search is incomplete and cannot prove that a formula has no satisfying assignment when none exists. However, despite this limitation, incomplete methods for solving large satisfiability problems are proving their worth in applications ranging from planning to circuit design and diagnosis [12,13,23].

Significant progress has been made on improving the efficiency of these methods since the development of GSAT. In fact, a series of innovations have led to current search methods that are now an order of magnitude faster.

Perhaps the most significant early improvement was to incorporate a “random walk” component where variables were flipped from within random falsified clauses [21]. This greatly accelerated search and led to the development of the very successful WSAT procedure [22]. A contemporary idea was to keep a tabu list [15] or break ties in favor of least recently flipped variables [7,8] to prevent GSAT from repeating earlier moves. The resulting TSAT and HSAT procedures were also improvements over GSAT, but to a lesser extent. The culmination of these ideas was the development of the Novelty and R\_Novelty procedures which combined a preference for least recently flipped variables in a WSAT-type random walk [16], yielding methods that are currently among the fastest known.

A different line of research has considered adding clause-weights to the basic GSAT objective (which merely counts the number of unsatisfied clauses) in an attempt to guide the search from local basins of attraction to other parts of the search space [3–6,17,21]. These methods have proved harder to control than the above techniques, and it has only been recent that clause re-weighting has been developed into a state of the art method. The series of “discrete Lagrange multiplier” (DLM) systems developed in [25–27] have demonstrated competitive results on benchmark challenge problems in the DIMACS and SATLIB repositories.<sup>2</sup>

Although these developments are impressive, a systematic understanding of local search methods for satisfiability problems remains elusive. Research in this area has been largely empirical and it is still often hard to predict the effects of a minor change in a procedure, even when this results in dramatic differences in search times.

In this paper we identify three simple, intuitive measures of local search effectiveness: depth, mobility, and coverage. We show that effective local search methods for finding satisfying assignments exhibit all three characteristics. These, however, are conflicting demands, and successful methods are primarily characterized by their ability to effectively manage the tradeoff between these factors—whereas ineffective methods tend to fail on at least one measure. Our goal is to be able to distinguish between effective and ineffective search strategies in a given problem (or diagnose problems with a given method, or tune parameters) without having to run exhaustive search experiments to their completion.

To further justify this endeavor, we introduce a new local search procedure, SDF (“smoothed descent and flood”), that arose from our investigation of the characteristics of effective local search procedures. We show that SDF exhibits uniformly good depth, mobility, and coverage values, and consequently achieves good search performance (in terms of the number of search steps required) on a large collection of benchmark satisfiability problems. This paper revises and extends the earlier work reported in [20].

---

<sup>2</sup> URLs <ftp://dimacs.rutgers.edu/pub/challenge/satisfiability/benchmarks/cnf> and <http://aida.intellektik.informatik.tu-darmstadt.de/~hoos/SATLIB/> respectively.

## 2. Local search procedures

In this paper we investigate several dominant local search procedures from the recent literature. Although many of these strategies appear to be only superficial variants of one another, they demonstrate dramatically different problem solving performance and (as we will see) they exhibit distinct local search characteristics as well.

The local search procedures we consider start with a random variable assignment  $\mathbf{x} = \langle x_1, \dots, x_n \rangle$ ,  $x \in \{0, 1\}$ , and make local moves by flipping one variable  $x_i$  at a time (setting  $x'_i = 1 - x_i$ ) until they either find a satisfying assignment or reach a maximum number of moves. For any variable assignment there are a total of  $n$  possible variables to consider, and the various strategies differ in how they make this choice. Current methods uniformly adopt the original GSAT objective of simply minimizing the number of unsatisfied clauses

$$g(\mathbf{x}) = \sum_{c_j \in \text{clauses}} 1_{(\mathbf{x} \text{ falsifies } c_j)} \quad (1)$$

perhaps with some minor variation such as introducing clause weights or considering how many new clauses become falsified by a flip (break count) or how many new clauses become satisfied (make count). The specific flip selection strategies we investigate along with their free parameters (shown in parentheses) are as follows.

**GSAT()** Flip the variable  $x_i$  that results in the fewest total number of clauses being unsatisfied. Break ties uniformly at random [24].

**HSAT()** Same as GSAT, but break ties in favor of the least recently flipped variable [7].

**WSAT-G( $p$ )** Pick a random unsatisfied clause  $c_j$ . With probability  $p$  flip a random  $x_i$  in  $c_j$ . Otherwise flip the variable in  $c_j$  that results in the smallest total number of unsatisfied clauses [16].

**WSAT-B( $p$ )** Same as WSAT-G, except in the latter case, flip the variable that would cause the smallest number of *new* clauses to become unsatisfied [16].

**WSAT( $p$ )** Same as WSAT-B, except first check whether some variable  $x_i$  would not falsify any new clauses if flipped, and always take such a move if available [16, 22].

**Novelty( $p$ )** Pick a random clause  $c_j$ . Flip the variable  $x_i$  in  $c_j$  that would result in the smallest total number of unsatisfied clauses, unless  $x_i$  is the most recently flipped variable in  $c_j$ . In the latter case, flip  $x_i$  with probability  $1 - p$  and otherwise flip the variable  $x_k$  in  $c_j$  that results in the second smallest total number of unsatisfied clauses [16].

**Novelty+( $p, q$ )** Same as Novelty, except that after the clause  $c_j$  is selected, flip a random  $x_i$  in  $c_j$  with probability  $q$ , and otherwise continue with Novelty [11].

The recent **DLM** procedure is much more complex than the above methods. However, it is arguably the most efficient search system for satisfying assignments currently known. DLM keeps a vector of nonnegative weights  $w_j$  on the clauses  $c_j$  and then employs a GSAT

style local search to reduce the total weight of unsatisfied clauses. Once a local minimum is reached, the weights of the unsatisfied clauses are increased and the search is continued. In addition, DLM also employs a tabu list on flipped variables. The exact calculation for the weight updates is complex and the interested reader is referred to [25–27] for details. Despite its overall complexity (the publically released implementation contains 16 free parameters) the architects of DLM have managed to engineer it into achieving state of the art performance [27]—a fact which we verify below. To run DLM in our experiments we explored the five default parameter sets supplied in the public software release.<sup>3</sup>

Note that, conventionally, all of these local search procedures have an outer loop that places an upper bound,  $t$ , on the maximum number of flips allowed before re-starting with a new random assignment. However, we will not focus on random restarts in our experiments below because *any* search strategy can be improved (or at the very least, not damaged) by choosing an appropriate cutoff value  $t$  [9,10]. In fact, it is straightforward and well known how to do this optimally (in principle): For a given search strategy and problem, let the random variable  $T$  denote the number of flips needed to reach a solution in a single run, and let  $T_t$  denote the number of flips needed when using a random restart after every  $t$  flips. We then have the straightforward equality [18]

$$E(T_t) = \frac{t}{P(T \leq t)} - [t - E(T | T \leq t)] \quad (2)$$

which simply states that  $E(T_t)$  is  $t$  times the expected number of restarts needed to find a solution ( $t/P(T \leq t)$ ), minus a small correction which accounts for the fact that on the last restart the search will generally find the solution before the maximum cutoff value has been reached. Note that this always offers a potential improvement in principle, since one could choose the optimal cutoff value

$$t^* = \arg \min_{t: 0 < t \leq \infty} E(T_t) \quad (3)$$

which will yield a substantial reduction in expected search time for most natural search distributions [10] and, at the very least, not increase the expected search time for any distribution (see Appendix A for a detailed discussion). Therefore, we will focus on investigating the single run characteristics of the various variable selection policies, but be sure to report estimates of what the optimum achievable performance would be using random restarts. We report this optimal quantity for every procedure using the empirical distribution of  $T$  over several runs (at least 100) to estimate  $E(T_t^*)$ .

### 3. Measuring local search performance

In order to tune the parameters of a search strategy, determine whether a strategic innovation is helpful, or even debug an implementation, it would be useful to be able to measure how well a search is progressing without having to run it to completion on large, difficult problems.

<sup>3</sup> Software available at <http://manip.crhc.uiuc.edu>.

### 3.1. Depth

To begin, we consider a simple and obvious measure of local search performance that has no doubt been used to tune and debug many search strategies in the past.

**Depth** measures how many clauses remain unsatisfied as the search proceeds. Intuitively, this indicates how deep in the objective  $g$  the search is remaining. To get an overall summary, we take a depth average over all search steps (after the first  $t_d$  steps<sup>4</sup>). Note that it is desirable to obtain a small value of depth.

Although simple minded, and certainly not the complete story, it is clear that effective search strategies do tend to descend rapidly in the objective function and remain at good objective values as the search proceeds. By contrast, strategies that fail to persistently stay at good objective values usually have very little chance of finding a satisfying assignment in a reasonable number of flips [16].

To demonstrate this rather obvious effect, consider the problem of tuning the noise parameter  $p$  for the WSAT procedure on a given problem. Here we use the uf100-0953 problem from the SATLIB repository to demonstrate our point.<sup>5</sup> Table 1 shows that higher noise levels cause WSAT to stay higher in the objective function and significantly increases the numbers of flips needed to reach a solution for this problem. (The SDF procedure in the table is introduced in Section 4 below.) This result holds for the raw average number of flips and also for the optimal expected number of flips using an optimal maximum flips cutoff with random restarts,  $\hat{E}(T_{t^*})$  (estimated by choosing the  $t^*$  that minimizes (2) under the empirical distribution). The explanation is obvious: by repeatedly flipping an arbitrary random variable in an unsatisfied clause, WSAT is frequently “kicked up” to higher objective values—to the extent that it begins to spend significant search time simply re-descending to a lower objective value, only to be prematurely kicked up again.

Although depth is a simplistic measure, it proves to be very useful for tuning noise and temperature parameters in local search procedures. By measuring depth, one can determine if the search is spending too much time recovering from large increases in the objective function and not enough time exploring near the bottom of the objective. More importantly, maintaining depth appears to be *necessary* for achieving reasonable search times. Table 2 shows the results of a large experiment conducted on the entire collection of 2700 uf problems in SATLIB. This comparison ranked four comparable methods—DLM, Novelty, Novelty+, and WSAT—in terms of their search depth and average flips. For each problem, the four methods were run 100 times and the optimal expected flip count (using an ideal restart scheme) was estimated for each, and then the methods were ranked in terms of their estimated optimal flip count and average depth. Each (flips rank, depth rank) pair was then recorded in a table. The relative frequencies of these pairs is summarized in Table 2. This

<sup>4</sup> Note that a random initial assignment will generally have poor depth, but most search methods will nevertheless settle into a lower steady state behavior after the initial transient phase. In our experiments we simply ignore the first  $t_d = 100$  flips to calculate the average depth to avoid this initial transient phase.

<sup>5</sup> The uf series of problems are randomly generated 3-CNF formulae that are generated at the phase transition ratio of 4.3 clauses to variables. Such formulae have roughly a 50% chance of being satisfiable, but uf contains only verified satisfiable instances. For a recent approach to generating hard random *satisfiable* instances see [1].

Table 1

Average number of unsatisfied clauses obtained by various search procedures over the length of a search run (depth), along with the average number of flips needed to find a solution and the estimated average number of flips needed under an optimal re-start scheme. Results are averaged over 100 runs on problem uf100-0953 from SATLIB

| 100 runs on<br>uf100-0953 | Average<br>depth | Average<br>flips | Est. optimal<br>average flips<br>using restarts |
|---------------------------|------------------|------------------|-------------------------------------------------|
| WSAT(.5)                  | 5.16             | 11,757           | 9,802                                           |
| WSAT(.7)                  | 8.60             | 18,042           | 17,282                                          |
| WSAT(.8)                  | 10.3             | 25,543           | 18,698                                          |
| WSAT(.9)                  | 12.3             | 59,042           | 53,451                                          |
| Novelty(.5)               | 3.75             | 4,916            | 4,563                                           |
| Novelty+(.5, .01)         | 3.68             | 3,965            | 3,965                                           |
| DLM(pars4)                | 5.40             | 2,182            | 1,984                                           |
| SDF(.00085)               | 3.03             | 1,192            | 1,174                                           |

Table 2

Frequencies of (flips rank, depth rank) pairs from among four search procedures, DLM, Novelty, Novelty+ and WSAT, measured over the entire collection of uf problems in SATLIB (2700 problems in total)

| Flips<br>rank | Depth rank |     |     |         |
|---------------|------------|-----|-----|---------|
|               | best 1     | 2   | 3   | worst 4 |
| best 1        | .74        | .09 | .13 | .05     |
| 2             | .10        | .28 | .38 | .25     |
| 3             | .14        | .42 | .34 | .11     |
| worst 4       | .03        | .22 | .16 | .60     |

table shows that the highest ranked method in terms of search efficiency was almost always ranked near the top in terms of search depth, and almost never near the bottom rank.

### 3.2. Mobility

Although useful, depth alone is clearly not a *sufficient* criterion for ensuring good search performance. A local search could easily become stuck at a good objective value, and yet fail to explore widely. To account for this possibility we introduce another measure of local search effectiveness.

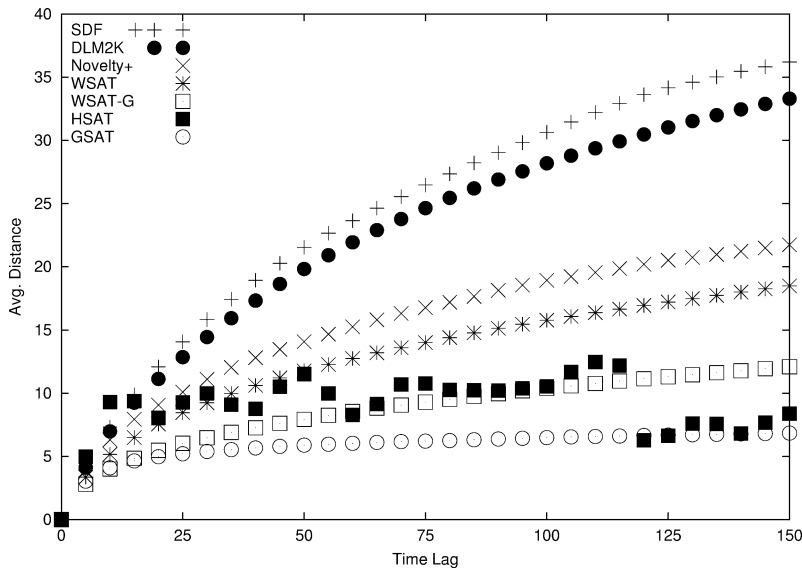

Fig. 1. Average Hamming distance between variable assignments at different time lags obtained by various search procedures. Distances are averaged over the length of each search run and then averaged across 100 repetitions of the uf100-0953 problem in SATLIB.

**Mobility** measures how rapidly a local search moves in the search space. We measure mobility by calculating the Hamming distance<sup>6</sup> between variable assignments that are  $k$  steps apart in the search sequence and average this quantity over the entire sequence to obtain average distances at time lags  $k = 1, 2, 3, \dots$ , etc. It is desirable to obtain a large value of mobility since this indicates that the search is moving rapidly through the space.

Mobility is obviously very important in a local search. In fact, most of the significant innovations in local search methods over the last decade appear to have the effect of substantially improving mobility without significantly damaging depth. This is demonstrated clearly in Fig. 1 and Table 3 for the uf100-0953 problem. It appears that the dramatic improvements of these methods could have been predicted from their improved mobility scores (while maintaining comparable depth scores).

Fig. 1 and Table 3 cover several highlights in the development of local search methods for satisfiability. For example, one of the first useful innovations to GSAT was to add a preference for least recently flipped variables, resulting in the superior HSAT procedure. Table 3 shows that one benefit of this change is to increase mobility without damaging search depth, which corresponds to improved solution times. (GSAT failed to solve the problem within 500,000 steps on 100 trials, whereas HSAT solved it once.) Another early innovation was to incorporate “random walk” in GSAT. Fig. 1 shows that WSAT-G

<sup>6</sup> The Hamming distance between two Boolean vectors is simply the number of positions where the vectors disagree.

Table 3

Hamming distance between assignments 100 steps apart in the search, averaged over the length of a search run (along with depth and search step measures). Results are averaged over 100 runs on problem uf100-0953 in SATLIB

| 100 runs on<br>uf100-0953 | Average<br>mobility | Average<br>depth | Average<br>flips | Est. optimal<br>average flips<br>using restarts |
|---------------------------|---------------------|------------------|------------------|-------------------------------------------------|
| GSAT()                    | 6.0                 | 2.19             | 500,000          | <i>na</i>                                       |
| HSAT()                    | 9.0                 | 2.06             | 495,003          | 16,700                                          |
| WSAT-G(.5)                | 10.1                | 4.20             | 29,661           | 15,442                                          |
| WSAT(.5)                  | 16.1                | 5.16             | 11,757           | 9,802                                           |
| Novelty(.5)               | 19.0                | 3.75             | 4,916            | 4,563                                           |
| Novelty+ (.5, .01)        | 18.7                | 3.68             | 3,965            | 3,965                                           |
| DLM(pars4)                | 28.6                | 5.40             | 2,182            | 1,984                                           |
| SDF(.00085)               | 29.7                | 3.03             | 1,192            | 1,174                                           |

also delivers a noticeable increase in mobility—again resulting in a dramatic reduction in solution times (Table 3). It is interesting to note that the apparently subtle distinction between WSAT-G and WSAT in terms of their definition is no longer subtle here: WSAT offers a dramatic improvement in mobility, along with an accompanying improvement in efficiency. The culmination of novelty and random walk in the Novelty procedure achieves even a further improvement in mobility, and, therefore it seems, solution time. Finally, the recent DLM procedure clearly exhibits superior mobility and search step scores to all the other methods (except perhaps for the SDF procedure, which we introduce below).

We have observed this relationship between mobility and solution time consistently over the entire range of problems we have investigated. In fact, Fig. 2 and Table 4 show that similar results are obtained by averaging over the entire collection of uf100 problems in the SATLIB repository (1000 problems in total). From these results it appears that, in addition to depth, mobility also is a necessary characteristic of an effective local search for satisfiability problems. To establish this further, Table 5 shows the results of a large experiment conducted on the entire collection of 2700 uf problems in SATLIB. The same four procedures were tested as before (DLM, Novelty, Novelty+, WSAT) and ranked in terms of their mobility scores and number of flips to find a solution. The results show that the highest ranked in terms of mobility is almost always ranked near the top in problem solving efficiency, and that low mobility tends to be correlated with inferior search efficiency.

### 3.3. Coverage

A final characteristic of local search behavior that we consider is easily demonstrated by a simple observation: Hoos [11] presents a small satisfiable CNF formula with five variables and six clauses that causes Novelty to sometimes get stuck (permanently) in a



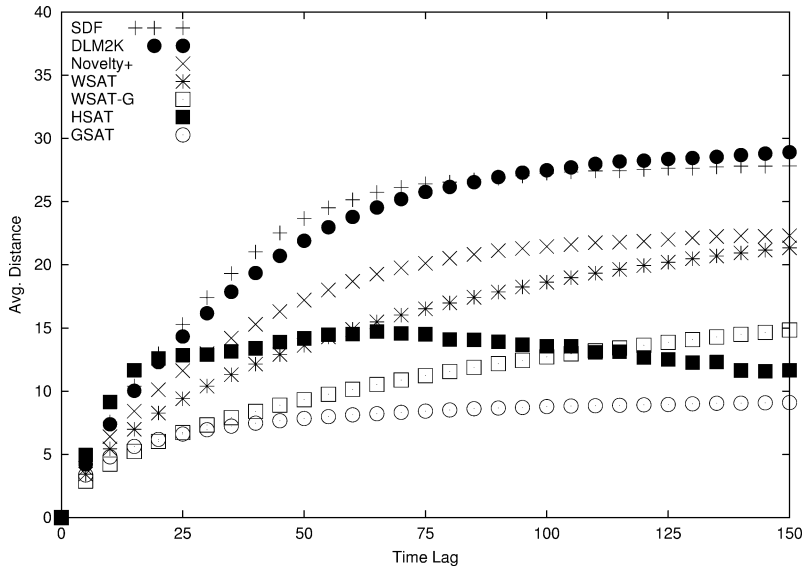

Fig. 2. Same as Fig. 1, but results are averaged over 100 runs on all 1000 uf100 problems from SATLIB.

Table 4

Same as Table 3, but results averaged over 100 runs on all 1000 uf100 problems from SATLIB

| 100 runs on 1000 uf100 problems | Average mobility | Average depth | Average flips | Est. optimal average flips using restarts |
|---------------------------------|------------------|---------------|---------------|-------------------------------------------|
| GSAT()                          | 8.8              | 1.62          | 74,595        | 10,823                                    |
| HSAT()                          | 15.8             | 1.35          | 73,510        | 2,503                                     |
| WSAT-G(.5)                      | 12.8             | 3.13          | 7,695         | 4,431                                     |
| WSAT(.5)                        | 18.9             | 3.49          | 3,582         | 2,828                                     |
| Novelty(.5)                     | 23.4             | 1.90          | 2,586         | 1,473                                     |
| Novelty+ (.5, .05)              | 23.6             | 1.93          | 2,224         | 1,393                                     |
| DLM(pars4)                      | 32.4             | 6.36          | 1,020         | 800                                       |
| SDF(.00085)                     | 31.8             | 1.41          | 876           | 755                                       |

local basin of attraction that prevents it from solving an otherwise trivial problem. The significance of this example is that Novelty exhibits good depth and mobility on this instance and yet fails to solve what is otherwise an easy problem. This concern led Hoos to develop the slightly modified procedure Novelty+ in [11]. The characteristic that the original Novelty procedure is missing in this case is coverage.

Table 5

Frequencies of (flips rank, mobility rank) pairs from among four search procedures, DLM, Novelty, Novelty+ and WSAT, measured over the entire collection of uf problems in SATLIB (2700 problems in total). Mobility is measured between assignments 100 steps apart in the search, averaged over the length of a search run

| Flips<br>rank | Mobility rank |     |     |         |
|---------------|---------------|-----|-----|---------|
|               | best 1        | 2   | 3   | worst 4 |
| best 1        | .92           | .07 | .01 | .00     |
| 2             | .06           | .72 | .21 | .01     |
| 3             | .03           | .20 | .75 | .03     |
| worst 4       | .00           | .01 | .03 | .96     |

**Coverage** measures how systematically the search explores the entire space. We compute a *rate* of coverage by first estimating the size of the largest unexplored “gap” in the search space (given by the maximum Hamming distance between any unexplored assignment and the nearest explored assignment) and measuring how rapidly the largest gap size is being reduced. In particular, we define the coverage rate to be  $(n - \text{max gap}) / (\text{search steps} \times n)$ . Note that it is desirable to have a high rate of coverage as this indicates that the search is systematically exploring new regions of the space as it proceeds.

Unfortunately, given a set of Boolean assignments it is NP-hard to find an assignment that has the greatest minimum Hamming distance from the set, and therefore we can only approximate this measure. It is possible to use a linear programming relaxation to efficiently calculate an upper bound on the maxi-min distance (since this target quantity can be determined by an integer linear program), but we instead use a cheaper heuristic that simply determines the maxi-min distance among negations of existing search assignments.

Table 6 shows that Hoos’s modified Novelty+ procedure improves the coverage rate of Novelty on the uf100-0953 problem. Table 7 shows that this effect is systematic over a large number of uf100 problems from the SATLIB repository. In these experiments Novelty+ demonstrates better coverage than Novelty while maintaining similar values on other measures, and thereby achieves better performance on almost every problem in the benchmark collections.

From these results it appears that coverage too is a necessary trait for effective local search in satisfiability problems. To further support this assertion Table 8 shows the results of a large experiment conducted on the entire collection of 1000 uf100 problems in SATLIB. Once again, we tested the four procedures, DLM, Novelty, Novelty+, and WSAT, and measured the (flips rank, coverage rank) frequencies they obtained. Table 8 shows that the highest ranked in terms of coverage is almost always ranked near the top in problem solving efficiency, and again almost never near the bottom rank.

It is important to emphasize that coverage captures a different aspect of local search behavior than mobility. Mobility characterizes how rapidly the search moves away from

Table 6

Average coverage rates obtained over entire search runs by various search procedures—along with depth, mobility, and number of search steps needed to find a solution. Results are averaged over 100 runs on problem uf100-0953 in SATLIB

| 100 runs on uf100-0953 | Average coverage rate | Average mobility | Average depth | Average flips | Est. optimal average flips using restarts |
|------------------------|-----------------------|------------------|---------------|---------------|-------------------------------------------|
| GSAT()                 | .00003                | 6.0              | 2.19          | 500,000       | <i>na</i>                                 |
| HSAT()                 | .00028                | 9.0              | 2.06          | 495,003       | 16,700                                    |
| WSAT-G(.5)             | .00011                | 10.1             | 4.20          | 29,661        | 15,442                                    |
| WSAT(.5)               | .00013                | 16.1             | 5.16          | 11,757        | 9,802                                     |
| Novelty(.5)            | .00013                | 19.0             | 3.75          | 4,916         | 4,563                                     |
| Novelty+ (.5, .01)     | .00017                | 18.7             | 3.68          | 3,965         | 3,965                                     |
| DLM(pars4)             | .00047                | 28.6             | 5.40          | 2,182         | 1,984                                     |
| SDF(.00085)            | .00053                | 29.7             | 3.03          | 1,192         | 1,174                                     |

Table 7

Same as Table 6, but results averaged over 100 runs on all 1000 uf100 problems from SATLIB

| 100 runs on 1000 uf100 problems | Average coverage rate | Average mobility | Average depth | Average flips | Est. optimal average flips using restarts |
|---------------------------------|-----------------------|------------------|---------------|---------------|-------------------------------------------|
| GSAT()                          | .0002                 | 8.8              | 1.62          | 74,595        | 10,823                                    |
| HSAT()                          | .0007                 | 15.8             | 1.35          | 73,510        | 2,503                                     |
| WSAT-G(.5)                      | .0004                 | 12.8             | 3.13          | 7,695         | 4,431                                     |
| WSAT(.5)                        | .0005                 | 18.9             | 3.49          | 3,582         | 2,828                                     |
| Novelty(.5)                     | .0010                 | 23.4             | 1.90          | 2,586         | 1,473                                     |
| Novelty+ (.5, .01)              | .0012                 | 23.6             | 1.93          | 2,224         | 1,393                                     |
| DLM(pars4)                      | .0014                 | 32.4             | 6.36          | 1,020         | 800                                       |
| SDF(.00085)                     | .0016                 | 33.4             | 1.52          | 870           | 725                                       |

recently explored assignments. However, this does not necessarily imply that the search is exploring significant new regions of the space. Moving rapidly within a large but confined region is quite different from systematically moving into new regions—even an extremely mobile search could be managing to ignore significant regions of the search space, which clearly is not a desirable characteristic in a general search procedure. Coverage, on the other hand, measures precisely how systematically the search is uncovering new regions of the space that have not been previously explored.

Table 8

Frequencies of (flips rank, coverage rank) pairs from among four search procedures, DLM, Novelty, Novelty+ and WSAT, measured over the entire collection of uf100 problems in SATLIB (1000 problems in total)

| Flips<br>rank | Coverage rank |     |     |         |
|---------------|---------------|-----|-----|---------|
|               | best 1        | 2   | 3   | worst 4 |
| best 1        | .67           | .22 | .10 | .01     |
| 2             | .19           | .43 | .32 | .06     |
| 3             | .13           | .32 | .45 | .11     |
| worst 4       | .00           | .04 | .14 | .82     |

### 3.4. Sufficiency

To this point we have investigated the *necessity* of the three proposed measures: depth, mobility and coverage. Necessity means that poor performance under any one measure leads to poor performance in overall problem solving behavior. However, these observations raise the question of the *sufficiency* of the three measures. That is, are simultaneously good depth, mobility, and coverage scores sufficient to ensure that effective problem solving performance is obtained (independent of other algorithmic details)? To present some evidence that this might be the case, at least empirically, we conducted the following study: We ran all of the local search methods we had available (DLM, SDF, Novelty+, Novelty, WSAT, HSAT, GSAT) with three parameter perturbations each, for a total of 21 methods on all 2700 uf problems in the SATLIB repository. Our intent was to measure the correlation between each performance measure and problem solving efficiency, while keeping the other search measures fixed but allowing all other aspects of algorithmic detail to vary as widely as possible.

Specifically, we ran all 21 methods on the 2700 uf problems and recorded their depth, mobility, coverage, and flips scores, averaged over 100 runs. This yielded 56,700  $\langle \text{depth}, \text{mobility}, \text{coverage}, \text{flips} \rangle$  tuples. For each of the candidate measures (say depth) we controlled the two other measures by placing the tuples into buckets defined by small intervals of the two remaining measures (say mobility and coverage); thereby attempting to keep the two other measures approximately constant. For example, in one experiment the 56,700 tuples were first partitioned into 25 buckets determined by mobility values in the 0–4, 5–8, 9–12, . . . , 97–100 percentiles, and then each of these buckets was further subdivided into 25 sub-buckets determined by coverage values in the 0–4, 5–8, . . . , 97–100 percentiles, so that in the end we obtained 625 buckets that each contained tuples with similar mobility and coverage scores. We then investigated the relationship between the depth and flip scores within each bucket. The idea was to keep mobility and coverage fixed and see how systematically depth might be correlated with search steps (flips). Note that, on average, each bucket should contain about  $56,700/625 \approx 91$   $\langle \text{depth}, \text{flips} \rangle$  pairs, which hopefully vary enough to allow us to detect any relationship in their behavior. In each bucket we measured the correlation between depth and flips using the standard sample

Table 9

Correlation of each proposed measure with number of search steps (flips), holding the other two measures roughly constant. Numbers are averaged across 625 buckets of controlled tuples obtained by running 21 methods over the entire collection of 2700 uf problems. The entropy numbers indicate the average diversity of methods in each bucket that support the estimates

|             | Depth | Mobility | Coverage |
|-------------|-------|----------|----------|
| Correlation | 0.21  | −0.31    | −0.49    |
| Entropy     | 2.20  | 2.07     | 1.23     |

correlation statistic, and also measured the diversity of the bucket by the entropy of the distribution of methods it contained.<sup>7</sup>

In this experiment, supporting evidence for the sufficiency of the set of criteria (independent of other algorithmic details) would be given by an appropriate correlation of each measure with flips while the other measures are held approximately constant, along with a diversity of methods supporting the inference. Such an outcome would suggest that, the two other measures being equal (but little else controlled), improving any one criterion would generally result in a reduction in search steps. In fact, this is basically what we observe. Table 9 shows that, the other two measures being held equal (but the algorithms varying otherwise), each one of the three criteria is correlated in the appropriate direction with search steps (positive with depth, negative with mobility and coverage), and each of these inferences is supported by a nontrivial diversity of search methods.

Although these results do not completely settle the matter, we believe that this experiment does provide some weak evidence that the three proposed criteria might at least be partially sufficient for yielding effective local search performance, in addition to their more obvious necessity.

### 3.5. Summary

Overall, our results lead us to hypothesize that local search procedures work effectively because they descend quickly in the objective, persistently explore variable assignments with good objective values, and do so while moving rapidly through the search space and visiting very different variable assignments without returning to previously explored regions. That is, we surmise that good local search methods do not possess any special ability to predict whether a local basin of attraction contains a solution—rather they simply descend to promising regions and explore near the bottom of the objective as rapidly, broadly, and systematically as possible, until they stumble across a solution. Although this is a rather simplistic view, it seems supported by our data, and moreover it has led to the development of a new local search technique that we introduce below. Our new procedure

<sup>7</sup> Hence, the maximum entropy is obtained by a uniform distribution over the 21 methods, for a value of 4.39 bits.

achieves good characteristics under these measures and, more importantly, exhibits good search-step performance in comparison to existing methods.

#### 4. A new local search strategy: SDF

Although the previous measures provide useful diagnostic information about local search performance, one of the the main contributions of this paper is a new local search procedure, which we call SDF for “smoothed descent and flood.” Our procedure has two main components that distinguish it from previous approaches. First, we perform steepest descent in a more informative objective function than earlier methods. Second, we use multiplicative clause re-weighting to rapidly move out of local minima and efficiently travel to promising new regions of the search space.

Recall that the standard GSAT objective  $g$  (defined in (1)) simply counts the number of unsatisfied clauses for a given variable assignment. We instead consider a smoothed objective  $f$  (defined below) which takes into account how many variables satisfy each clause. To explain this objective, it will be more convenient to think of a reversed goal where we seek to *maximize* the number of satisfied clauses rather than minimize the number of unsatisfied clauses. Our smoothed objective  $f$  works by favoring variable assignments that satisfy more clauses, but all things being equal, favoring assignments that satisfy more clauses twice (subject to satisfying the same number of clauses once), and so on. In effect, we introduce a tie-breaking criterion that decides, when two assignments satisfy the same number of clauses, that we should prefer the assignment which satisfies more clauses on two distinct variables, and if the assignments are still tied, that we should prefer the assignment that satisfies more clauses on three distinct variables, etc. This tie-breaking scheme can be expressed in a scalar function that gives a large increment to the first satisfying variable, and then gives exponentially diminishing increments for subsequent satisfying variables for a given clause. For  $k$ -CNF formulas with  $m$  clauses such a scoring function is

$$f(\mathbf{x}) = \sum_{c \in \text{clauses}} \text{score}(\# x_i \text{'s that satisfy } c), \quad (4)$$

where

$$\begin{aligned} \text{score}(0) &= 0, \\ \text{score}(1) &= m^{k-1}, \\ \text{score}(2) &= m^{k-1} + m^{k-2}, \\ &\vdots \\ \text{score}(k) &= m^{k-1} + m^{k-2} + \dots + 1. \end{aligned}$$

The key property of this scoring function is that the increment obtained by increasing the number of satisfying variables in one clause from  $j$  to  $j + 1$  is greater than the increment obtained by increasing the number of satisfying variables in all remaining  $m - 1$  clauses from  $j + 1$  all the way to  $k$ . That is

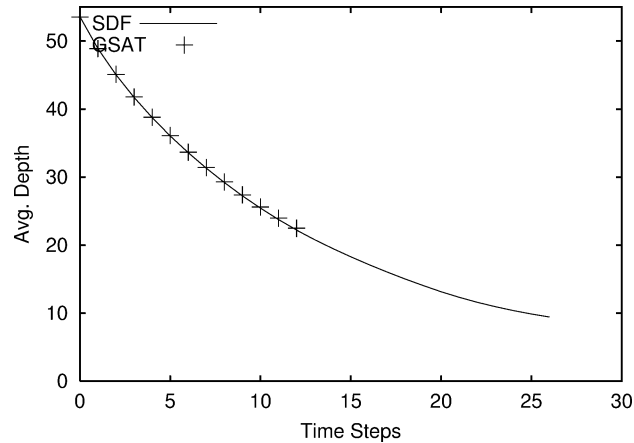

Fig. 3. Average number of unsatisfied clauses (depth in  $g$ ) achieved before reaching a local optimum or plateau. Results are obtained by running initial descents in  $g$  and  $-f$  on uf100-0953 until the first local optimum or plateau point is reached, and then reporting the average  $g$  value at a given time point if at least 95 of 100 runs have successfully descended that many steps.

$$\begin{aligned}
 score(j+1) - score(j) &= m^{k-j-1} \\
 &> (m-1) \left( \frac{m^{k-j-1} - 1}{m-1} \right) \\
 &= (m-1)(m^{k-j-2} + m^{k-j-3} + \dots + 1) \\
 &= (m-1)(score(k) - score(j+1)).
 \end{aligned}$$

Our intuition is that performing steepest ascent in this objective should help build robustness in the current variable assignment which the search can later exploit to satisfy new clauses. That is, once the search has reached an assignment where no additional clauses can be satisfied immediately, we can still proceed productively by finding assignments that satisfy more clauses on two distinct variables, or failing that, finding assignments that satisfy more clauses on three distinct variables, etc.—with the hope that this will create the opportunity to satisfy more clauses (once) later in the search. We have clearly observed this phenomenon in our experiments. In fact, Fig. 3 shows that following a steepest ascent in  $f$  descends deeper in the original GSAT objective  $g$  than the GSAT procedure itself (before either procedure reaches a local extrema or plateau). This happens because plateaus in the GSAT objective  $g$  are not plateaus in  $f$ —such plateaus are usually opportunities to build up robustness in satisfied clauses which can be later exploited to satisfy new clauses. This effect is clearly demonstrated in Fig. 3, and has been observed over the range of problems we have considered. This gives our first evidence that the SDF procedure, by descending deeper in the GSAT objective, has the potential to improve the performance of existing local search methods.

The main issue is to cope with local maxima in the new objective. That is, although  $f$  does not contain many plateaus, the local search procedure now has to deal with legitimate (and numerous) local maxima in the search space. While this means that plateau walking

is no longer a significant issue, it creates the difficulty of having to escape from true traps in the objective function. Our strategy for coping with local maxima involves the second main idea behind the SDF procedure: *multiplicative* clause re-weighting. That is, we first consider a clause-weighted version of our smoothed objective

$$h(\mathbf{x}, \mathbf{w}) = \sum_{c \in \text{clauses}} w(c) \text{score}(\# x_i \text{'s that satisfy } c) \quad (5)$$

(where the clause weights are initially assigned to be uniform,  $w(c) = 1/m$ ) and then use multiplicative weight updates to escape local maxima. Note that when a search is trapped at a local maxima the current variable assignment must leave some subset of the clauses unsatisfied. Many authors have observed that such local extrema can be “filled in” by increasing the weight of the unsatisfied clauses to create a new search direction that allows the procedure to escape [5,17,21,26,27]. That is, one permits a few low weight clauses to be sacrificed in the interests of satisfying an important high weight clause. However, previous published re-weighting schemes all use *additive* updates to increment the clause weights. Unfortunately, additive updates do not work very well on difficult search problems because the clauses develop large weight differences over time, and this causes the update mechanism to lose its ability to rapidly adapt the weight profile to new regions of the search space. Multiplicative updating has the advantage of maintaining the ability to swiftly change the weight profile whenever necessary.

However, a final issue we faced in devising our update procedure was that persistently satisfied clauses would often lose their weight to the extent that they would become frequently falsified, and consequently the depth of search (as measured in  $g$ ) would deteriorate. To cope with this effect, we flattened the weight profile of the satisfied clauses at each re-weighting by shrinking them towards their common mean. This increased the weights of satisfied clauses without requiring them to be explicitly falsified, and had the overall effect of restoring search depth and improving performance. The final SDF procedure we tested is summarized as follows.<sup>8</sup>

**SDF**( $\delta, \rho$ ) Flip the variable  $x_i$  that leads to the greatest increase in the weighted objective  $h(\mathbf{x}, \mathbf{w})$ . If the current variable assignment is a local maximum and not a solution, then re-weight the clauses to create a new ascent direction and continue (see Fig. 4).

**Re-weight**( $\delta, \rho$ ) Multiplicatively re-weight the unsatisfied clauses and re-normalize the clause weights  $\mathbf{w}$  so that the resulting largest difference in the  $h(\mathbf{x}, \mathbf{w})$  objective (when flipping any one variable) is  $\delta$ . (That is, create a new greedy search direction.) Then flatten the weight profile of the *satisfied* clauses by shrinking them  $1 - \rho$  of the distance towards their common mean (to prevent the weights from becoming too small and causing clauses to be gratuitously falsified in the future). The technical details of this algorithm are outlined in Fig. 5.

One interesting aspect of this procedure is that it is almost completely deterministic (given that ties are rare in the objective, and ignoring the application of random re-

<sup>8</sup> Our code is publically available at <http://ai.uwaterloo.ca/~dale/software/sdf/>.



---

```

procedure SDF( $\delta, \rho$ )

  Initialize the weight  $w(c) := \frac{1}{m}$  for each clause  $c$ 
  Start with a random initial variable assignment  $\mathbf{x}$ 
  Compute  $\Delta_{x_i}(\mathbf{x}, \mathbf{w}) := h(\mathbf{x}_{(x_i:=1-x_i)}, \mathbf{w}) - h(\mathbf{x}, \mathbf{w})$  for each variable  $x_i$ 

  while  $\mathbf{x}$  is not a satisfying assignment
     $x_{i^*} := \arg \max_{x_i} \Delta_{x_i}(\mathbf{x}, \mathbf{w})$ 
    if  $\Delta_{x_{i^*}}(\mathbf{x}, \mathbf{w}) < 0$ 
       $\mathbf{w} := \mathbf{Re-weight}(\delta, \rho)(\mathbf{x}, \mathbf{w})$ 
      Recompute  $\Delta_{x_i}(\mathbf{x}, \mathbf{w})$  for each  $x_i$ 
       $x_{i^*} := \arg \max_{x_i} \Delta_{x_i}(\mathbf{x}, \mathbf{w})$ 
    end
     $x_{i^*} := 1 - x_{i^*}$ 
    Update  $\Delta_{x_i}(\mathbf{x}, \mathbf{w})$  for each  $x_i$  that shares a common clause with  $x_{i^*}$ 
  end

```

---

Fig. 4. Simple outline of the SDF procedure. Note that this description does not mention an outer re-start loop because we assume this can be implicitly added to any local search procedure, as discussed in Section 2. Also note that an efficient implementation of this procedure requires the quantities  $\Delta_{x_i}$  to be maintained implicitly and updated in a lazy manner that avoids explicitly looping through the entire set of clauses; see <http://ai.uwaterloo.ca/~dale/software/sdf/> for details.

starts) and yet seems to perform very well in comparison to the best current methods, all of which are highly stochastic. We claim that much of the reason for this success is that SDF maintains good depth, mobility, and coverage in its search. This is clearly demonstrated in all of the experiments of Section 3, where it is shown that SDF obtains superior measurements under every criteria.

## 5. Evaluation

We have conducted an evaluation of SDF on several thousand benchmark satisfiability problems from the SATLIB and DIMACS repositories. The results we obtained yield a number of observations. In general, comparing SDF to the very effective Novelty+ and WSAT procedures we find that SDF typically reduces the number of flips needed to find a satisfying assignment over the best of Novelty+ and WSAT by a factor of two to three on random satisfiable CNF formulae (in the uf, flat, and aim collections) and usually by much larger factors on non-random CNF formulae (in the SATLIB blocks-world and ais problem sets). These results are consistent across the range of the problems we have investigated, and hold up even when considering the mean flips without restarts, median flips, and optimal expected flips using restarts,  $\hat{E}(T_{i^*})$ , estimated from (1). Although much simpler, SDF appears to be competitive with DLM in terms of search steps as well (although not in terms of CPU time).

**procedure** Re-weight( $\delta, \rho$ )

Let  $F$  = total weight of false clauses

$S$  = total weight of satisfied clauses (note that  $F + S = 1$ )

For each variable  $x_i$  let

$f_i^+$  = total increment from currently false clauses (i.e., satisfied by  $1 - x_i$ )

$s_i^+$  = total increment from currently satisfied clauses (satisfied by  $1 - x_i$ )

$s_i^-$  = total decrement from currently satisfied clauses (i.e., satisfied by  $x_i$ )

Note that  $\Delta_{x_i} = f_i^+ + s_i^+ - s_i^-$  (defined in Fig. 4) and also by the assumption of re-weighting we have  $\Delta_{x_i} < 0$  for all  $x_i$ .

For each variable  $x_i$  such that  $f_i^+ > 0$ , compute

$$\alpha_i := \frac{s_i^- - s_i^+ + S\delta}{F(s_i^- - s_i^+) + S f_i^+}, \quad \beta_i := \frac{1 - F\alpha_i}{S}$$

This ensures the following two properties (proved in Appendix B):

Property 1:  $\alpha_i F + \beta_i S = 1$ ,  $\alpha_i > 1$ , and  $\beta_i < 1$

Property 2: if  $f_i^+ > 0$ , then  $\Delta'_{x_i} = \alpha_i f_i^+ + \beta_i s_i^+ - \beta_i s_i^- = \delta$

Assign  $\alpha_* := \min_i \alpha_i$ ,  $\beta_* := \frac{1 - F\alpha_*}{S}$ ,

$$w(c) := \begin{cases} \alpha_* w(c) & \text{if } c \text{ currently false} \\ \beta_* w(c) & \text{if } c \text{ currently satisfied} \end{cases}$$

This ensures that  $\Delta_{x_*} = \delta$  by Property 2, and  $F + S = 1$  by Property 1.

To shrink the satisfied clause weights towards their common mean, assign

$$\overline{sat} := \frac{1}{\#sat} \sum_{c \in sat} w(c)$$

$$w(c) := (1 - \rho) \overline{sat} + \rho w(c)$$

Note that this still ensures  $F + S = 1$  (Property 3, proved in Appendix B).

Fig. 5. Conceptual outline of the multiplicative clause re-weighting procedure, demonstrating the required calculations and key properties. Note that an efficient implementation of this procedure requires the clause weights to be maintained implicitly and only updated when directly connected to a flipped variable; see <http://ai.uwaterloo.ca/~dale/software/sdf/> for details.

In more detail, our experiments were conducted by running each search procedure 100 times on each problem and then averaging the results over these runs. The numbers reported are average number of flips needed to find a solution, the estimated optimal number of flips needed under an optimal restart scheme (estimated using (3)), the percentage of failures over 100 repetitions (cut off at 500,000 flips),<sup>9</sup> and the average CPU time per flip (in milliseconds on a PIII 450MHz processor). The methods we tested were SDF, DLM, Novelty, Novelty+, and WSAT, and on smaller problems HSAT, GSAT, and

<sup>9</sup> All problems were cut off at 500,000 flips except bw\_large.c (1,000,000 flips).

Table 10  
Flat problems (100 problems each)

| flat100            | Avg. Flips | Opt. Flips | Fail% | msec. per flip |
|--------------------|------------|------------|-------|----------------|
| WSAT(.5)           | 42,795     | 34,814     | .28   | 2.7            |
| Novelty(.6)        | 17,979     | 13,946     | .14   | 2.8            |
| Novelty+ (.6, .01) | 17,134     | 12,540     | .02   | 2.8            |
| DLM(pars4)         | 9,571      | 8,314      | 0     | 4.8            |
| SDF(.0002)         | 7,175      | 6,474      | 0     | 20.9           |
| flat125            | Avg. Flips | Opt. Flips | Fail% | msec. per flip |
| WSAT(.5)           | 75,135     | 66,232     | 1.6   | 2.9            |
| Novelty(.6)        | 32,727     | 24,616     | .75   | 3.0            |
| Novelty+ (.5, .01) | 36,739     | 26,066     | .78   | 2.8            |
| DLM(pars4)         | 26,182     | 21,506     | 0     | 5.1            |
| SDF(.0002)         | 15,169     | 13,293     | 0     | 21.4           |
| flat150            | Avg. Flips | Opt. Flips | Fail% | msec. per flip |
| WSAT(.5)           | 146,163    | 129,407    | 8.3   | 2.9            |
| Novelty(.5)        | 92,859     | 60,827     | 3.6   | 2.9            |
| Novelty+ (.5, .01) | 81,276     | 57,698     | 2.7   | 2.9            |
| DLM(pars4)         | 69,779     | 54,637     | .98   | 5.5            |
| SDF(.0001)         | 36,304     | 29,327     | .22   | 25.3           |
| flat200            | Avg. Flips | Opt. Flips | Fail% | msec. per flip |
| WSAT(.5)           | 299,847    | 298,091    | 36    | 3.1            |
| Novelty(.5)        | 235,679    | 204,691    | 26    | 3.0            |
| Novelty+ (.6, .01) | 238,738    | 224,526    | 27    | 3.3            |
| DLM(pars4)         | 280,401    | 242,439    | 31    | 6.2            |
| SDF(.0001)         | 140,005    | 112,020    | 7     | 26.1           |

simulated annealing. To ensure that we compared SDF to other state of the art clause re-weighting schemes, we included the most recent version of DLM [27] in our experiments. All parameter settings used for each procedure are indicated in parentheses.<sup>10</sup>

There are two broad classes of experiments reported in Tables 10 to 17. The first class, Tables 10 to 14, covers a wide array of *random* satisfiability problems from both the

<sup>10</sup> All parameter settings are shown explicitly, with the exception of SDF where only the value of  $\delta$  is given (since  $\rho$  is fixed to 0.995 in all cases), and DLM where the 16 parameters were set by testing each of the 5 default parameter sets given at <http://manip.crhc.uiuc.edu> and choosing the best of these sets.

Table 11  
 Small uf problems (100 problems each, except uf50 and uf100 which have 1000 problems each)

| uf50              | Avg. Flips | Opt. Flips | Fail% | msec. per flip |
|-------------------|------------|------------|-------|----------------|
| WSAT(.5)          | 656        | 496        | 0     | 3.6            |
| Novelty(.7)       | 633        | 230        | .07   | 3.3            |
| Novelty+(.7, .01) | 259        | 235        | 0     | 3.8            |
| DLM(pars4)        | 186        | 160        | 0     | 6.6            |
| SDF(.003)         | 156        | 140        | 0     | 11.6           |
| uf75              | Avg. Flips | Opt. Flips | Fail% | msec. per flip |
| WSAT(.5)          | 1818       | 1365       | 0     | 3.7            |
| Novelty(.6)       | 1493       | 635        | .15   | 3.3            |
| Novelty+(.7, .01) | 661        | 605        | 0     | 3.8            |
| DLM(pars4)        | 515        | 404        | 0     | 6.1            |
| SDF(.0015)        | 435        | 389        | 0     | 13.4           |
| uf100             | Avg. Flips | Opt. Flips | Fail% | msec. per flip |
| WSAT(.5)          | 3622       | 2813       | 0     | 3.8            |
| Novelty(.6)       | 2788       | 1273       | .23   | 3.4            |
| Novelty+(.6, .01) | 1581       | 1261       | 0     | 3.7            |
| DLM(pars4)        | 1020       | 800        | 0     | 6.3            |
| SDF(.00085)       | 864        | 725        | 0     | 15.9           |
| uf125             | Avg. Flips | Opt. Flips | Fail% | msec. per flip |
| WSAT(.5)          | 8966       | 5452       | .01   | 3.9            |
| Novelty(.7)       | 4892       | 2785       | .32   | 3.7            |
| Novelty+(.7, .01) | 3314       | 2606       | 0     | 4.0            |
| DLM(pars4)        | 2096       | 1573       | 0     | 6.1            |
| SDF(.0006)        | 1879       | 1505       | 0     | 17.6           |

SATLIB and DIMACS repositories. The second class of experiments, Tables 15 to 17, covers large *structured* problems in these collections. The results in all cases are averaged over all problems in the respective problem set.

The results on the second class of (structured) problems are particularly striking. These problems challenge the previous generation of local search methods (WSAT, Novelty and Novelty+) and yet SDF and DLM both appear to solve them with significantly fewer search steps. This suggests that, although SDF and DLM shares many similarities to other local

Table 12  
Larger uf problems (100 problems each)

| uf150             | Avg.<br>Flips | Opt.<br>Flips | Fail% | msec.<br>per flip |
|-------------------|---------------|---------------|-------|-------------------|
| WSAT(.5)          | 14,353        | 8027          | .3    | 4.1               |
| Novelty(.6)       | 7551          | 4344          | .3    | 3.8               |
| Novelty+(.6, .01) | 6075          | 4817          | 0     | 4.0               |
| DLM(pars4)        | 3263          | 2455          | 0     | 6.3               |
| SDF(.00065)       | 3312          | 2533          | 0     | 18.5              |
| uf175             | Avg.<br>Flips | Opt.<br>Flips | Fail% | msec.<br>per flip |
| WSAT(.5)          | 27,493        | 19,289        | .66   | 4.2               |
| Novelty(.6)       | 14,342        | 8554          | .31   | 4.1               |
| Novelty+(.6, .01) | 13,820        | 8453          | .17   | 4.2               |
| DLM(pars4)        | 6819          | 4923          | 0     | 6.4               |
| SDF(.0005)        | 7228          | 5491          | 0     | 20.3              |
| uf200             | Avg.<br>Flips | Opt.<br>Flips | Fail% | msec.<br>per flip |
| WSAT(.5)          | 40,323        | 30,859        | 2.7   | 4.3               |
| Novelty(.6)       | 26,463        | 20,437        | 1.9   | 4.3               |
| Novelty+(.6, .01) | 26,479        | 21,503        | 1.9   | 4.3               |
| DLM(pars4)        | 13,316        | 9,020         | .08   | 6.6               |
| SDF(.0003)        | 14,962        | 8,467         | .44   | 22.6              |
| uf225             | Avg.<br>Flips | Opt.<br>Flips | Fail% | msec.<br>per flip |
| WSAT(.5)          | 44,808        | 34,481        | 2.5   | 4.4               |
| Novelty(.6)       | 31,634        | 22,909        | 2.5   | 4.4               |
| Novelty+(.6, .01) | 31,412        | 20,823        | 2.3   | 4.4               |
| DLM(pars4)        | 16,098        | 10,072        | .04   | 6.7               |
| SDF(.00025)       | 17,505        | 10,366        | .22   | 24.0              |

search methods currently in use, they might offer a qualitatively different approach that could yield benefits in real world problems.

To compare SDF to DLM directly, we find that they generally achieved solutions in about the same number of steps. SDF has a significant flips advantage on flat, but DLM holds a significant advantage on aim. However, SDF is consistently a factor of three to four times slower than DLM in terms of CPU overhead, and therefore SDF is not competitive with

Table 13  
Largest uf problems (uf250), 100 problems

| uf250             | Avg. Flips | Opt. Flips | Fail% | msec. per flip |
|-------------------|------------|------------|-------|----------------|
| WSAT(.5)          | 41,287     | 36,310     | 1.4   | 4.5            |
| Novelty(.6)       | 27,677     | 24,453     | 1.7   | 4.5            |
| Novelty+(.6, .01) | 27,639     | 25,954     | 1.8   | 4.9            |
| DLM(pars4)        | 22,635     | 12,387     | .25   | 6.9            |
| SDF(.0002)        | 18,905     | 13,433     | .26   | 25.4           |

Table 14  
jnh and aim problems (16 problems each)

| jnh               | Avg. Flips | Opt. Flips | Fail% | msec. per flip |
|-------------------|------------|------------|-------|----------------|
| WSAT(.5)          | 4706       | 3776       | 0     | 7.8            |
| Novelty(.5)       | 3523       | 2689       | .06   | 7.2            |
| Novelty+(.5, .01) | 3135       | 2576       | 0     | 7.3            |
| DLM(pars4)        | 879        | 723        | 0     | 12.1           |
| SDF(.0005)        | 917        | 877        | 0     | 48.4           |
| aim-100           | Avg. Flips | Opt. Flips | Fail% | msec. per flip |
| WSAT(.5)          | 252,616    | 252,469    | 50    | 2.0            |
| Novelty(.6)       | 251,230    | 251,002    | 50    | 1.7            |
| Novelty+(.7, .01) | 251,587    | 250,494    | 50    | 1.7            |
| DLM(pars5)        | 2,655      | 2,463      | 0     | 4.4            |
| SDF(.0005)        | 105,105    | 102,503    | 16    | 12.9           |
| aim-200           | Avg. Flips | Opt. Flips | Fail% | msec. per flip |
| WSAT(.5)          | 268,238    | 258,620    | 50    | 2.1            |
| Novelty(.5)       | 270,069    | 257,488    | 51    | 1.8            |
| Novelty+(.6, .01) | 263,989    | 257,927    | 50    | 1.8            |
| DLM(pars1)        | 51,671     | 41,464     | 1.4   | 3.3            |
| SDF(.00025)       | 268,238    | 258,620    | 50    | 21.3           |

DLM in terms of CPU time. Nevertheless, SDF is competitive with the previous systems (WSAT, Novelty+) in CPU time on large structured problems such as ais and bw\_large.<sup>11</sup>

<sup>11</sup> The similarity in flips performance between SDF and DLM suggests that the simpler SDF procedure might be capturing some essential aspect of the complex DLM system that accounts for its performance advantage over WSAT and Novelty. We hope to investigate this question further in future research.

Table 15  
ais (All-Interval series) problems (1 problem each)

| ais6               | Avg.<br>Flips | Opt.<br>Flips | Fail% | msec.<br>per flip |
|--------------------|---------------|---------------|-------|-------------------|
| WSAT(.7)           | 1,332         | 1,061         | 0     | 5.7               |
| Novelty(.4)        | 455,008       | 1,047         | 91    | 5.0               |
| Novelty+ (.7, .01) | 8,563         | 1,083         | 0     | 5.5               |
| DLM(pars4)         | 410           | 406           | 0     | 9.5               |
| SDF(.0015)         | 441           | 441           | 0     | 19.3              |
| ais8               | Avg.<br>Flips | Opt.<br>Flips | Fail% | msec.<br>per flip |
| WSAT(.3)           | 29,706        | 8,000         | 0     | 7.9               |
| Novelty(.7)        | 495,002       | 13,300        | 99    | 8.5               |
| Novelty+ (.4, .01) | 155,992       | 8,791         | 7     | 8.0               |
| DLM(pars1)         | 4,678         | 4,460         | 0     | 18.1              |
| SDF(.0004)         | 4,748         | 4,641         | 0     | 36.2              |
| ais10              | Avg.<br>Flips | Opt.<br>Flips | Fail% | msec.<br>per flip |
| WSAT(.3)           | 190,325       | 65,600        | 13    | 11.4              |
| Novelty(.5)        | 500,000       | na            | 100   | 12.2              |
| Novelty+ (.3, .01) | 433,702       | 433,702       | 72    | 11.3              |
| DLM(pars4)         | 18,420        | 14,306        | 0     | 16.5              |
| SDF(.00013)        | 20,464        | 16,320        | 0     | 55.8              |
| ais12              | Avg.<br>Flips | Opt.<br>Flips | Fail% | msec.<br>per flip |
| WSAT(.6)           | 487,542       | 487,542       | 96    | 16.1              |
| Novelty(.5)        | 500,000       | na            | 100   | 15.7              |
| Novelty+ (.2, .01) | 491,714       | 491,714       | 97    | 15.1              |
| DLM(pars1)         | 165,904       | 165,904       | 3     | 30.0              |
| SDF(.0001)         | 156,253       | 132,342       | 5     | 81.1              |

It is obvious that our current implementation of SDF is not without its limitations. We are currently using a floating-point implementation that maintains a number of additional quantities over DLM, and therefore even though SDF executes a comparable number of search steps (flips) to solve most problems, each search step is more expensive to compute. (DLM almost entirely avoids the use of floating point arithmetic.) However, the complexity of DLM's main loop is in principle no simpler than SDF's, and we are hopeful that further optimizations might improve the relative performance. Unfortunately, our floating point implementation creates the additional disadvantage of round off errors which eventually

Table 16  
 bw\_large problems (1 problem each)

| bw_large.a        | Avg. Flips | Opt. Flips | Fail% | msec. per flip |
|-------------------|------------|------------|-------|----------------|
| WSAT(.5)          | 20,753     | 17,340     | 0     | 7.3            |
| Novelty(.4)       | 9,028      | 9,022      | 0     | 7.1            |
| Novelty+(.4, .01) | 10,553     | 10,546     | 0     | 7.0            |
| DLM(pars4)        | 3,712      | 3,701      | 0     | 15.7           |
| SDF(.0001)        | 2,906      | 2,902      | 0     | 39.8           |
| bw_large.b        | Avg. Flips | Opt. Flips | Fail% | msec. per flip |
| WSAT(.4)          | 336,855    | 336,855    | 42    | 9.3            |
| Novelty(.4)       | 195,126    | 170,137    | 4     | 9.4            |
| Novelty+(.4, .01) | 147,370    | 130,004    | 4     | 9.4            |
| DLM(pars4)        | 44,361     | 39,216     | 0     | 19.2           |
| SDF(.00005)       | 37,122     | 36,728     | 0     | 79.8           |
| bw_large.c        | Avg. Flips | Opt. Flips | Fail% | msec. per flip |
| WSAT(.5)          | 1,000,000  | na         | 100   | 18.1           |
| Novelty(.5)       | 1,000,000  | na         | 100   | 18.8           |
| Novelty+(.2, .01) | 924,451    | 924,451    | 83    | 12.9           |
| DLM(pars4)        | 895,213    | 895,213    | 77    | 37.9           |
| SDF(.00002)       | 939,975    | 938,975    | 89    | 171            |

cause the variable scores and clause weights to drift out of agreement with one another (primarily due to the use of an efficient lazy weight updating scheme). To compensate, we have to run periodic correction loops in SDF to explicitly re-calculate these quantities—which adds to the overall computational overhead. It remains an open question as to whether a fundamentally faster algorithm in terms of CPU time can be developed from the ideas presented in this paper.

## 6. Conclusion

We have introduced three simple measures of local search performance—depth, mobility, and coverage—and demonstrated that achieving adequate measures under these criteria appears to be necessary for achieving effective problem solving performance using greedy local search for satisfiability problems. We provided two general pieces of evidence to support each claim of necessity: First, we demonstrated that superior local search procedures exhibit uniformly good scores under all three criteria, whereas inferior search procedures always exhibit significantly weaker scores on at least one criterion.



Table 17  
Other structured problems (1 problem each)

| medium                       | Avg. Flips | Opt. Flips | Fail% | msec. per flip |
|------------------------------|------------|------------|-------|----------------|
| WSAT(.5)                     | 1038       | 961        | 0     | 5.1            |
| Novelty(.5)                  | 496        | 493        | 0     | 5.6            |
| Novelty+(.6, .01)            | 482        | 482        | 0     | 5.5            |
| DLM(pars4)                   | 265        | 265        | 0     | 13.0           |
| SDF(.0005)                   | 297        | 293        | 0     | 17.9           |
| huge                         | Avg. Flips | Opt. Flips | Fail% | msec. per flip |
| WSAT(.5)                     | 20,154     | 19,502     | 0     | 10.1           |
| Novelty(.4)                  | 9,988      | 9,065      | 0     | 9.7            |
| Novelty+(.4, .01)            | 10,032     | 9,759      | 0     | 9.8            |
| DLM(pars4)                   | 3,658      | 3,532      | 0     | 21.8           |
| SDF(.0001)                   | 3,018      | 2,960      | 0     | 44.0           |
| logistics.c                  | Avg. Flips | Opt. Flips | Fail% | msec. per flip |
| WSAT(.2)                     | 168,895    | 168,895    | 2     | 5.8            |
| Novelty(.4)                  | 115,654    | 115,120    | 1     | 6.3            |
| Novelty+(.3, .01)            | 109,575    | 108,141    | 1     | 6.5            |
| DLM(pars4)                   | 12,101     | 11,805     | 0     | 24.7           |
| SDF( $8.76 \times 10^{-6}$ ) | 16,849     | 16,688     | 0     | 170            |

Second, even among superior search procedures, there is a strong positive correlation between problem solving performance on one hand, and good measures under each of the search criteria on the other—and this holds for each of the three measures independently. Finally, to address the question of sufficiency, we provided experimental evidence that good performance under all three measures simultaneously appears to be predictive of effective local search performance. Our evidence for this claim is given by the observation that an improved rating under any one measure (holding the others fixed) systematically yields a predictive correlation with reduced number of search steps, roughly independent of other algorithmic details.

With the intent of creating a local search procedure that exhibits superior measures on all three criteria, we developed the new procedure SDF, which employs a smoothed version of the standard GSAT objective to obtain better depth scores, and uses multiplicative clause-weight updating to obtain better mobility and coverage scores than existing methods. The outcome is a simple search procedure that systematically reduces the number of search steps (flips) needed to find a solution over older methods, and competes very closely with the state of the art DLM system. Although SDF does not yet deliver an improvement in

CPU time (owing to its greater computational overhead per flip) the improvement in terms of flips does vindicate our claim that improvements under the three measurable search criteria should predict reductions in the number of search steps needed to find satisfying assignments.

By no means does this paper close the line of research on local search for satisfiability, nor does it settle the question about which are the best methods for simultaneously optimizing the three proposed criteria. One of the important directions for future research is to investigate other forms of global search strategies for satisfiability (for example, population-based and global-stochastic search methods) and see if any significant further gains can be made. Even for the SDF procedure itself, we continue to investigate simplifications that might allow reductions in CPU time in addition to improvements in overall numerical stability. Finally, it remains future work to conduct a theoretical analysis of the search criteria we have proposed and verify whatever guarantees they might offer for local search performance, as well as discover what the ultimate limitations of these measures are.

### Acknowledgements

Research supported by NSERC, MITACS and CITO. Thanks to Fahiem Bacchus, Rob Holte, Holger Hoos, Henry Kautz, Bart Selman and Peter van Beek for earlier helpful comments.

### Appendix A. Effects of random re-starts

It can be shown that imposing an ideal re-start value  $t^*$  on the random search time  $T$  yields an improvement in expected time for most natural search distributions. To see this, note that for any random variable  $T$  we have

$$E(T) = E(T \mid T \leq t)P(T \leq t) + E(T \mid T > t)P(T > t). \quad (\text{A.1})$$

From (2) we know that the expected search time when using a random restart after  $t$  flips is

$$\begin{aligned} E(T_t) &= \frac{t}{P(T \leq t)} - [t - E(T \mid T \leq t)] \\ &= t \left( \frac{1}{P(T \leq t)} - 1 \right) + E(T \mid T \leq t) \\ &= t \frac{P(T > t)}{P(T \leq t)} + E(T \mid T \leq t). \end{aligned} \quad (\text{A.2})$$

To determine whether (A.2) offers an improvement over (A.1) first note that for an exponential random variable  $T$  (i.e., such that  $P(T > x) = e^{-x/\mu}$  for all  $x > 0$ ) we actually have  $E(T) = E(T_t)$  for every cutoff value  $t > 0$ . This follows from the “memoryless property” of exponential random variables which states that  $P(T > t + x \mid T > t) = P(T > x)$  for all  $t > 0$  and  $x > 0$  [19], and immediately implies that

$$E(T | T > t) = t + E(T) \quad (\text{A.3})$$

for all  $t > 0$ . Thus

$$\begin{aligned} E(T) &= E(T | T > t)P(T > t) + E(T | T \leq t)P(T \leq t) \\ &= tP(T > t) + E(T)P(T > t) + E(T | T \leq t)P(T \leq t) \end{aligned} \quad (\text{A.4})$$

from (A.3), and therefore for exponential random variables we always have

$$E(T)P(T \leq t) = tP(T > t) + E(T | T \leq t)P(T \leq t)$$

and hence

$$E(T) = t \frac{P(T > t)}{P(T \leq t)} + E(T | T \leq t) = E(T_t) \quad (\text{A.5})$$

for all  $t > 0$ , as stated.

So imposing a random restart after a cutoff value  $t$  does not affect the expectation of any exponential random variable  $T$ . It might therefore appear that random restarts may not offer a useful improvement in general. However, the equality (A.5) only holds because of the memoryless property (A.3), and it turns out that this property holds for all  $t > 0$  *only* for exponential random variables [19].

By contrast, it is widely believed that the search time distributions for heuristic search algorithms exhibit a “heavy tailed” behavior on difficult constraint satisfaction problems [10]. That is, the tail of the search time distribution  $P(T > x)$  is not exponential, but instead is typically a much slower converging function such as a power law  $P(T > x) = Cx^{-\alpha}$  for  $\alpha > 0$ ,  $C > 0$  (where the tails become heavier for smaller  $\alpha$ ) [10]. A simple example of a power law distribution is a Pareto density  $p(x) = \alpha(1+x)^{-\alpha-1}$ ,  $x > 0$ ,  $\alpha > 0$ , which defines a random variable  $T$  such that  $P(T > x) = (1+x)^{-\alpha}$ . The  $k$ th moments of power law distributions are only defined for  $k < \alpha$ , and in particular their expected values become infinite for  $\alpha \leq 1$ .

For heavy tailed distributions in general, it is easy to demonstrate that a random re-start strategy will always yield a reduction in expected search time. To see this, first consider the case of a heavy tailed distribution with a finite expected search time; that is, a power law distribution such that  $\alpha > 1$ . An interesting property of such a distribution is that it is no longer memoryless. In fact, the additional expected search time actually *increases* given that an early solution has not been found:

$$E(T | T > t) > t + E(T) \quad (\text{A.6})$$

for  $t > 0$ , which is in direct contrast to (A.3). From this property it immediately follows that a random re-start strategy yields an improvement in expected solution time, since

$$\begin{aligned} E(T) &= E(T | T > t)P(T > t) + E(T | T \leq t)P(T \leq t) \\ &> tP(T > t) + E(T)P(T > t) + E(T | T \leq t)P(T \leq t) \\ &= E(T_t). \end{aligned}$$

For example, for a Pareto distribution with  $\alpha > 1$  we have  $E(T | T > f) = t + E(T) + tE(T)$  for all  $t > 0$  and hence immediately obtain  $E(T_t) < E(T)$ .

For the more extreme case of a heavy tailed distribution with an *infinite* expected value (i.e., when  $\alpha \leq 1$ ) it is obvious that a random re-start strategy significantly improves search time, since  $E(T_t)$  is clearly finite (A.2) for any  $t$  such that  $P(T \leq t) > 0$  by inspection.

Therefore, in general, using a random restart strategy with a cutoff value

$$t^* = \arg \min_{t: 0 < t \leq \infty} E(T_t)$$

(where  $E(T_\infty)$  is defined to be  $E(T)$ ) should improve expected search time, since if (A.6) is satisfied for any  $t$  we will immediately obtain  $E(T_{t^*}) < E(T)$ , and otherwise if no such value of  $t$  exists we obtain  $E(T_{t^*}) = E(T)$  (and hence cause no harm). Therefore, under any circumstance, employing a random restart strategy after an ideal cutoff value  $t^*$  is never a losing strategy.

## Appendix B. Properties of clause re-weighting scheme

**Proof of Property 1.** First, to show that  $\alpha_i F + \beta_i S = 1$ , note

$$\alpha_i F + \beta_i S = \alpha_i F + \frac{1 - F\alpha_i}{S} S = \alpha_i F + 1 - F\alpha_i = 1.$$

Next, to verify that  $\alpha_i > 1$ , recall that by assumption  $\Delta_{x_i} = f_i^+ + s_i^+ - s_i^- < 0 < \delta$ , and therefore

$$\begin{aligned} \alpha_i &= \frac{s_i^- - s_i^+ + S\delta}{F(s_i^- - s_i^+) + S f_i^+} > \frac{s_i^- - s_i^+ + S(f_i^+ + s_i^+ - s_i^-)}{F(s_i^- - s_i^+) + S f_i^+} \\ &= \frac{(1 - S)(s_i^- - s_i^+) + S f_i^+}{F(s_i^- - s_i^+) + S f_i^+} = \frac{F(s_i^- - s_i^+) + S f_i^+}{F(s_i^- - s_i^+) + S f_i^+} \\ &= 1. \end{aligned}$$

Finally, to verify that  $\beta_i < 1$ , note that  $\beta_i = (1 - F\alpha_i)/S < (1 - F)/S = 1$ .  $\square$

**Proof of Property 2.** Assume  $F > 0$  and  $f_i^+ > 0$ . First note that

$$\begin{aligned} \alpha_i &= \frac{s_i^- - s_i^+ + S\delta}{S f_i^+ + F(s_i^- - s_i^+)} = \frac{\frac{s_i^- - s_i^+}{S f_i^+} + \frac{\delta}{f_i^+}}{1 + \frac{F(s_i^- - s_i^+)}{S f_i^+}} \\ &= \frac{s_i^- - s_i^+}{S f_i^+} + \frac{\delta}{f_i^+} - \frac{F\alpha_i(s_i^- - s_i^+)}{S f_i^+} \tag{B.1} \\ &= \left( \frac{1 - F\alpha_i}{S} \right) \frac{s_i^- - s_i^+}{f_i^+} + \frac{\delta}{f_i^+} = \frac{\beta_i(s_i^- - s_i^+) + \delta}{f_i^+}, \end{aligned}$$

where the second step (B.1) uses the fact that  $\alpha = \frac{a}{1+b}$  if and only if  $\alpha = a - b\alpha$ . Thus  $\alpha_i f_i^+ + \beta_i(s_i^+ - s_i^-) = \beta_i(s_i^- - s_i^+) + \delta + \beta_i(s_i^+ - s_i^-) = \delta$ .  $\square$

**Proof of Property 3.** Recall that before shrinking the satisfied clause weights towards their common mean we have  $S = \sum_{c \in \text{sat}} w(c)$  and  $\overline{\text{sat}} = S/(\#\text{sat})$ . Let  $w'(c) = (1 - \rho)\overline{\text{sat}} + \rho w(c)$ . We then obtain

$$\begin{aligned} S' &= \sum_{c \in \text{sat}} w'(c) = (1 - \rho)\overline{\text{sat}}(\#\text{sat}) + \rho \sum_{c \in \text{sat}} w(c) \\ &= (1 - \rho) \sum_{c \in \text{sat}} w(c) + \rho \sum_{c \in \text{sat}} w(c) = S \end{aligned}$$

and therefore  $S' + F = S + F = 1$ .  $\square$

## References

- [1] D. Achlioptas, C. Gomes, H. Kautz, B. Selman, Generating satisfiable problem instances, in: Proc. AAAI-2000, Austin, TX, 2000, pp. 256–261.
- [2] R. Bayardo, R. Schrag, Using CSP look-back techniques to solve real-world SAT instances, in: Proc. AAAI-97, Providence, RI, 1997, pp. 203–208.
- [3] B. Cha, K. Iwama, Performance test of local search algorithms using new types of random CNF formulas, in: Proc. IJCAI-95, Montreal, Quebec, 1995, pp. 304–310.
- [4] B. Cha, K. Iwama, Adding new clauses for faster local search, in: Proc. AAAI-96, Portland, OR, 1996, pp. 332–337.
- [5] J. Frank, Weighting for Godot: Learning heuristics for GSAT, in: Proc. AAAI-96, Portland, OR, 1996, pp. 338–343.
- [6] J. Frank, Learning short-term weights for GSAT, in: Proc. IJCAI-97, Nagoya, Japan, 1997, pp. 384–391.
- [7] I. Gent, T. Walsh, Towards an understanding of hill-climbing procedures for SAT, in: Proc. AAAI-93, Washington, DC, 1993, pp. 28–33.
- [8] I. Gent, T. Walsh, Unsatisfied variables in local search, in: J. Hallam (Ed.), Hybrid Problems, Hybrid Solutions (AISB-95), IOS Press, Amsterdam, 1995.
- [9] C. Gomes, B. Selman, H. Kautz, Boosting combinatorial search through randomization, in: Proc. AAAI-98, Madison, WI, 1998, pp. 431–437.
- [10] C. Gomes, B. Selman, H. Kautz, Heavy-tailed phenomena in satisfiability and constraint satisfaction problems, *J. Automat. Reason.* 24 (1) (2000) 67–100.
- [11] H. Hoos, On the run-time behavior of stochastic local search algorithms for SAT, in: Proc. AAAI-99, Orlando, FL, 1999, pp. 661–666.
- [12] H. Kautz, B. Selman, Pushing the envelope: Planning, propositional logic, and stochastic search, in: Proc. AAAI-96, Portland, OR, 1996, pp. 1194–1201.
- [13] T. Larrabee, Test pattern generation using boolean satisfiability, *IEEE Trans. Computer-Aided Design* 11 (1) (1992) 4–15.
- [14] C. Li, Anbulagan, Heuristics based on unit propagation for satisfiability problems, in: Proc. IJCAI-97, Nagoya, Japan, 1997, pp. 366–371.
- [15] B. Mazure, L. Saïs, É. Grégoire, Tabu search for SAT, in: Proc. AAAI-97, Providence, RI, 1997, pp. 281–285.
- [16] D. McAllester, B. Selman, H. Kautz, Evidence for invariants in local search, in: Proc. AAAI-97, Providence, RI, 1997, pp. 321–326.
- [17] P. Morris, The breakout method for escaping from local minima, in: Proc. AAAI-93, Washington, DC, 1993, pp. 40–45.
- [18] A. Parkes, J. Walser, Tuning local search for satisfiability testing, in: Proc. AAAI-96, Portland, OR, 1996, pp. 356–362.
- [19] S. Ross, *Introduction to Probability Models*, 6th edn., Academic Press, San Diego, 1997.
- [20] D. Schuurmans, F. Southey, Local search characteristics of incomplete SAT procedures, in: Proc. AAAI-2000, Austin, TX, 2000, pp. 297–302.

- [21] B. Selman, H. Kautz, Domain-independent extensions to GSAT: Solving large structured satisfiability problems, in: Proc. IJCAI-93, Chambéry, France, 1993.
- [22] B. Selman, H. Kautz, B. Cohen, Noise strategies for improving local search, in: Proc. AAAI-94, Seattle, WA, 1994, pp. 337–343.
- [23] B. Selman, H. Kautz, D. McAllester, Ten challenges in propositional reasoning and search, in: Proc. IJCAI-97, Nagoya, Japan, 1997, pp. 50–54.
- [24] B. Selman, H. Levesque, D. Mitchell, A new method for solving hard satisfiability problems, in: Proc. AAAI-92, San Jose, CA, 1992, pp. 440–446.
- [25] Y. Shang, W. Wah, A discrete Lagrangian based global search method for solving satisfiability problems, *J. Global Optimization* 12 (1) (1998) 61–99.
- [26] Z. Wu, W. Wah, Trap escaping strategies in discrete Lagrangian methods for solving hard satisfiability and maximum satisfiability problems, in: Proc. AAAI-99, Orlando, FL, 1999, pp. 673–678.
- [27] Z. Wu, W. Wah, An efficient global-search strategy in discrete Lagrangian methods for solving hard satisfiability problems, in: Proc. AAAI-2000, Austin, TX, 2000, pp. 310–315.
